# Supplementary material for: Combinatorial F-G Immunogens as Nipah and Respiratory Syncytial Virus Vaccine Candidates
Source: MDPI journal article supplement (doi:10.3390/v13101942), 2021-09-28
Supplement: s1 [file s1]

*Supplementary Materials*

# Combinatorial F-G Immunogens as Nipah and Respiratory Syncytial Virus Vaccine Candidates

Ariel Isaacs <sup>1</sup>, Stacey T. M. Cheung <sup>1</sup>, Nazia Thakur <sup>2</sup>, Noushin Jaberolansar <sup>1,3</sup>, Andrew Young <sup>1,3</sup>, Naphak Modhiran <sup>1</sup>, Dalan Bailey <sup>2</sup>, Simon P. Graham <sup>2</sup>, Paul R. Young <sup>1,3,4</sup>, Keith J. Chappell <sup>1,3,4</sup> and Daniel Watterson <sup>1,4,\*</sup>

<sup>1</sup> School of Chemistry and Molecular Biosciences, University of Queensland, Saint Lucia 4067, Australia; a.isaacs@uq.edu.au (A.I.); s.cheung@uq.edu.au (S.T.M.C.); n.jaberolansar@uq.edu.au (N.J.); a.young4@uq.edu.au (A.Y.); n.modhiran@uq.edu.au (N.M.); p.young@uq.edu.au (P.R.Y.); k.chappell@uq.edu.au (K.J.C.)

<sup>2</sup> The Pirbright Institute, Pirbright, Woking GU24 0NF, UK; nazia.thakur@pirbright.ac.uk (N.T.); dalan.bailey@pirbright.ac.uk (D.B.); simon.graham@pirbright.ac.uk (S.P.G.)

<sup>3</sup> The Australian Institute for Biotechnology and Nanotechnology, University of Queensland, Saint Lucia 4067, Australia

<sup>4</sup> Australian Infectious Disease Research Centre, University of Queensland, Saint Lucia 4067, Australia

\* Correspondence: d.watterson@uq.edu.au

**Citation:** Isaacs, A.; Cheung, S.T.M.; Thakur, N.; Jaberolansar, N.; Young, A.; Modhiran, N.; Bailey, D.; Graham, S.P.; Young, P.R.; Chappell, K.J.; et al. Combinatorial F-G Immunogens as Nipah and Respiratory Syncytial Virus Vaccine Candidates. *Viruses* **2021**, *13*, 1942. <https://doi.org/10.3390/10.3390/v13101942>

Academic Editor: Christopher C. Broder

Received: 30 July 2021

Accepted: 21 September 2021

Published: 28 September 2021

**Publisher's Note:** MDPI stays neutral with regard to jurisdictional claims in published maps and institutional affiliations.

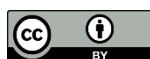

**Copyright:** © 2021 by the authors. Licensee MDPI, Basel, Switzerland. This article is an open access article distributed under the terms and conditions of the Creative Commons Attribution (CC BY) license (<http://creativecommons.org/licenses/by/4.0/>).

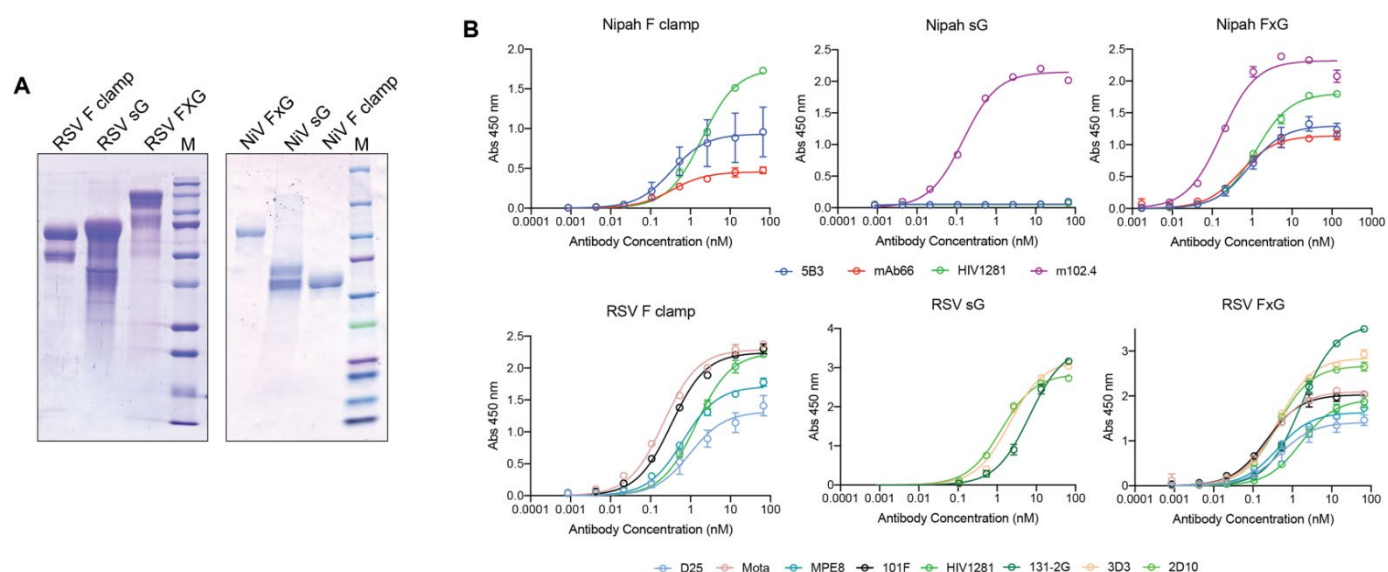

**Figure S1.** (A) SDS-PAGE of RSV and NiV antigens run under reducing conditions. M is Bio-Rad Kaleidoscope molecular marker. (B) Indirect ELISAs of mAbs against NiV and RSV antigens. Data shown of mean of duplicate values with standard deviation. Data fitted with one-site specific binding model to calculate  $K_d$ .

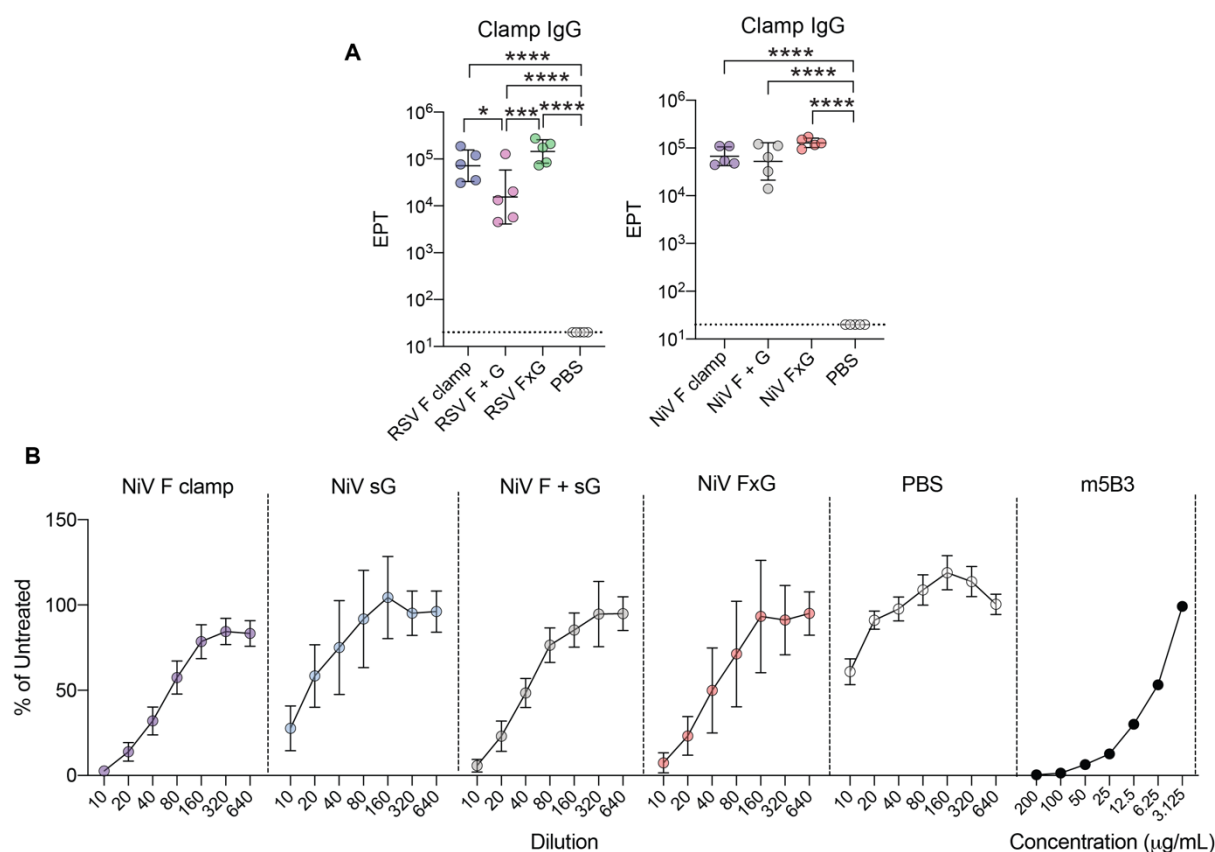

**Figure S2.** (A) Endpoint titer (EPT) of each RSV (left) and NiV (right) groups against the molecular clamp domain, assayed against a non-specific clamp-stabilised protein. Dotted line shows limit of detection and data is expressed as geometric mean with geometric standard deviation (SD). p-values calculated using a one-way Tukey's multiple comparison ANOVA on log transformed values, where \* =  $p < 0.05$ , \*\* =  $p < 0.005$ , \*\*\* =  $p < 0.0005$  and \*\*\*\* =  $p < 0.0001$ . (B) mFITs of NiV groups showing serial dilutions of sera from vaccinated groups as well as positive mAb controls. Each mouse sample was assayed in triplicate. Data is expressed as a percentage of the average luciferase readings seen in untreated controls (no serum) with 50% inhibition dotted line indicated ( $IC_{50}$ ). Values shown are group mean ( $n = 5$ ) with SD.

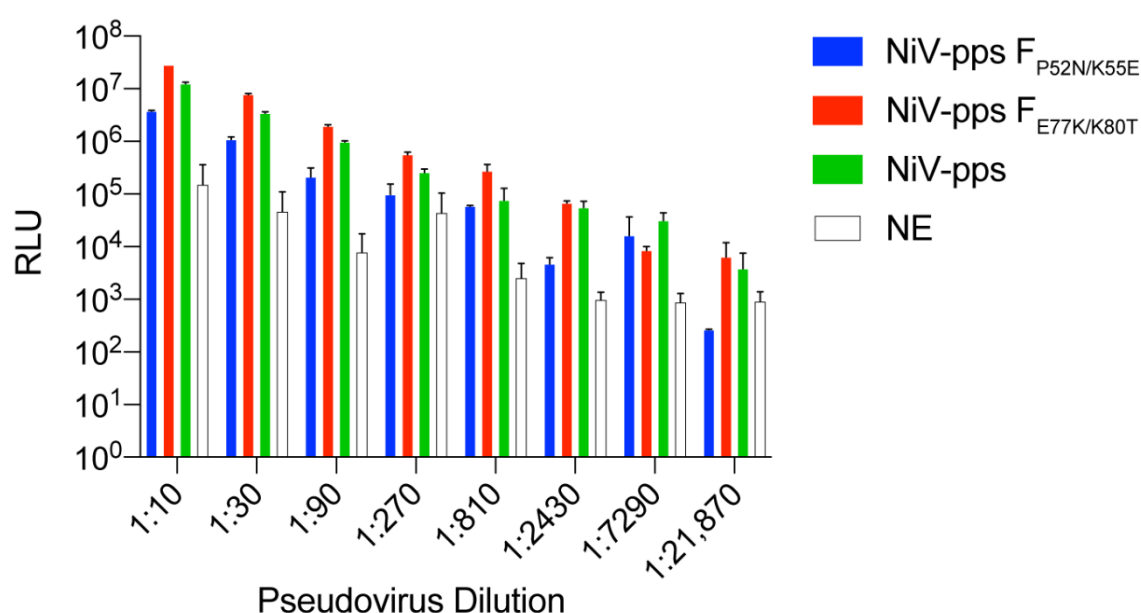

**Figure S3.** Titration of NiV pseudovirus (NiV-pps) wild-type or mutant F variants on BHK-21 cells. Titer is measured as relative light units (RLU) emitted by firefly luciferase reporter. Non-enveloped (NE) virus is included as background control.

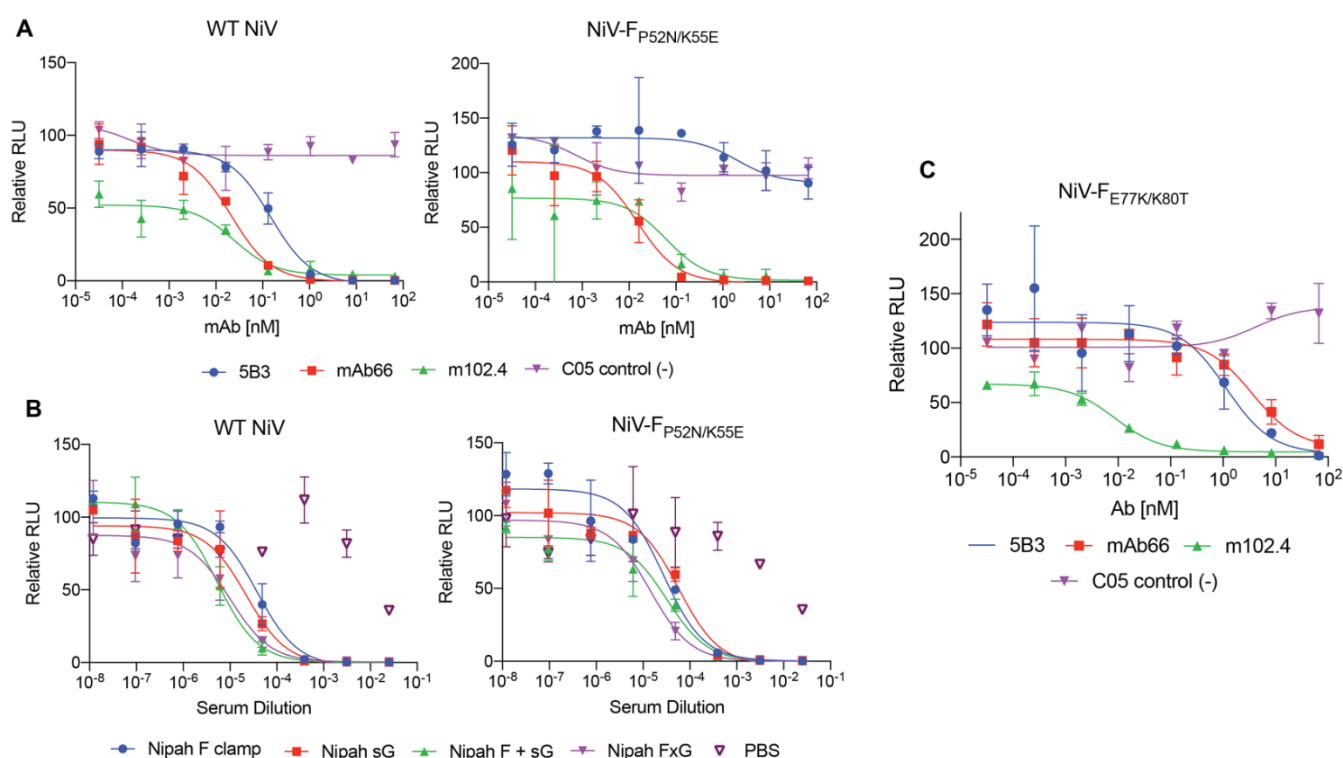

**Figure S4.** NiV pseudovirus neutralisation assays of mAbs (A) and sera (B) against wild-type NiV (WT) or NiV-F<sub>P52N/K55E</sub> mutant knockout. (C) NiV pseudovirus neutralisation assay of mAbs against NiV-F<sub>E77K/K80T</sub> mutant knockout. Data shown is duplicate values of pooled sera or duplicate values of mAbs expressed as percent inhibition relative to virus only readings (relative RLU). C05 is a non-specific antibody control.

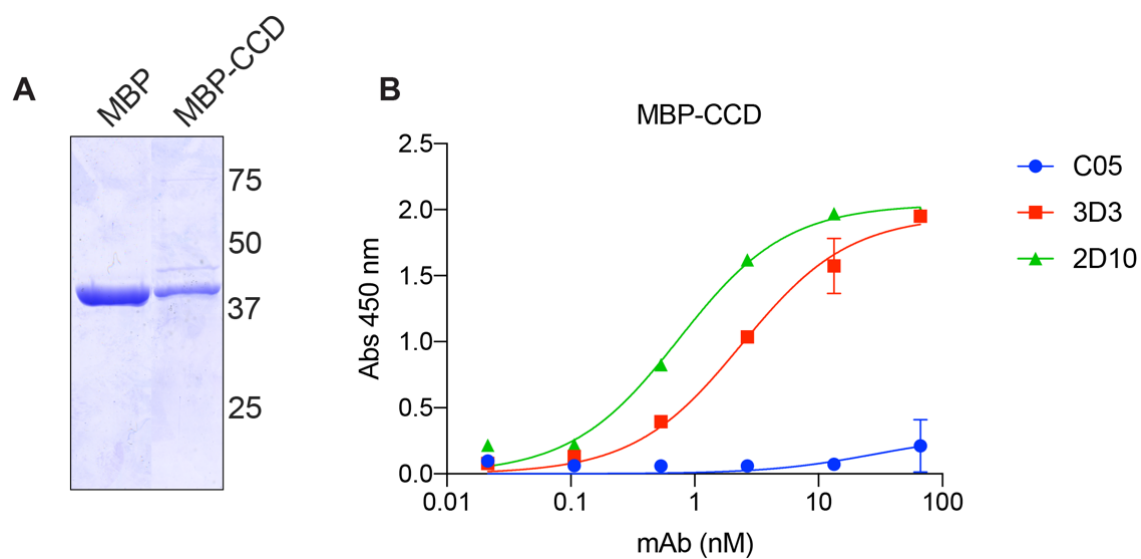

**Figure S5.** (A) SDS-PAGE of MBP and MBP-CCD purified protein run under reducing conditions. (B) Indirect ELISA of CCD-specific mAbs or non-specific control (C05) against MBP-CCD protein. Data shown is average of duplicate values with SD and background binding to MBP only subtracted.
